# Supplementary material for: Highly selective photocatalytic and sensing properties of 2D-ordered dome films of nano titania and nano Ag2+doped titania
Source: Royal Society of Chemistry journal article supplement (doi:10.1039/c1jm14216j), 2011-11-24
Supplement: c1jm14216j.pdf [file c1jm14216j.pdf]

## Supporting information.

### Highly Selective Photocatalytic and Sensing Properties of 2D-Ordered Dome films of Nano Titania and Nano Ag<sup>2+</sup> doped Titania

Shaofen Jin, Yuanzhi Li,\* Hao Xie, Xiong Chen, Tingting Tian, Xiujuan Zhao

State Key Laboratory of Silicate Materials for Architectures (Wuhan University of Technology), 122 Luoshi Road, Wuhan 430070, P. R. China

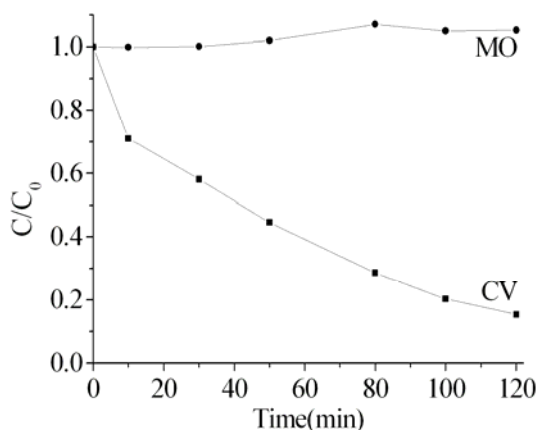

**Figure S1.** The time course of the decrease in the concentration for the degradation of the cationic CV and anionic MO under the UV-visible irradiation on the illuminated 2D-Ag-TiO<sub>2</sub> film that had been illuminated for three months under indoor fluorescent lamp at ambient temperature.

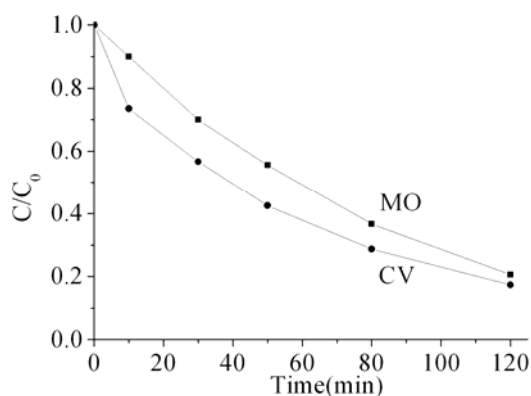

**Figure S2.** The time course of the decrease in the concentration for the photodegradation of the cationic CV and anionic MO on TiO<sub>2</sub>(P25) under the UV-visible irradiation.

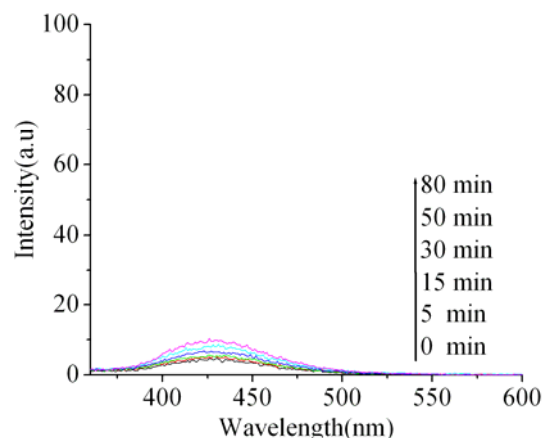

**Figure S3.** The time course of the fluorescence spectra of the aqueous basic solution of terephthalic acid with excitation at 315 nm in the presence of the 2D-Ag-TiO<sub>2</sub> film.

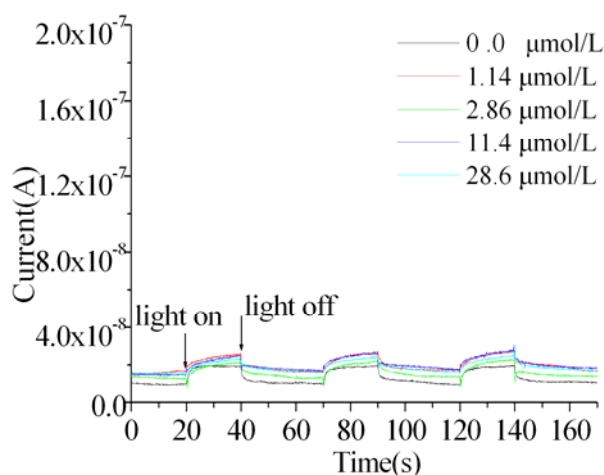

**Figure S4.** The transient response of the photocurrent with evolution of MO concentration for the 2D-TiO<sub>2</sub> film under visible irradiation.
